# Supplementary material for: Mediating Effect of Students’ Perception in Programming on the Relationship Between Project Work and College Students’ Interest in Programming
Source: Research Square preprint supplement (doi:10.21203/rs.3.rs-935163/v2), 2021-10-29
Supplement: Supplementary file 1 [file a88c5168e2f8e774bd349280.docx]

# APPENDIX A

Run MATRIX procedure:

***************** PROCESS Procedure for SPSS Version 3.5 ****************

Written by Andrew F. Hayes, Ph.D. www.afhayes.com

Documentation available in Hayes (2018). www.guilford.com/p/hayes3

********************************************************************

Model : 4

Y : CollegeI

X : ProjectW

M : StudentP

Sample Size: 368

********************************************************************

OUTCOME VARIABLE: StudentP

Model Summary

R R-sq MSE F df1 df2 p

.1744 .0304 .2135 11.4870 1.0000 366.0000 .0008

Model

coeff se t p LLCI ULCI

constant 1.9633 .1761 11.1478 .0000 1.6170 2.3096

ProjectW .2776 .0819 3.3892 .0008 .1165 .4386

Standardized coefficients

coeff

ProjectW .1744

********************************************************************

OUTCOME VARIABLE: CollegeI

Model Summary

R R-sq MSE F df1 df2 p

.0583 .0034 .1732 .6214 2.0000 365.0000 .5378

Model

coeff se t p LLCI ULCI

constant 2.3643 .1836 12.8789 .0000 2.0033 2.7253

ProjectW .0819 .0749 1.0932 .2750 -.0654 .2292

StudentP .0011 .0471 .0243 .9806 -.0914 .0937

Standardized coefficients

coeff

ProjectW .0580

StudentP .0013

******************** TOTAL EFFECT MODEL ***********************

OUTCOME VARIABLE: CollegeI

Model Summary

R R-sq MSE F df1 df2 p

.0582 .0034 .1727 1.2455 1.0000 366.0000 .2651

Model

coeff se t p LLCI ULCI

constant 2.3665 .1584 14.9404 .0000 2.0551 2.6780

ProjectW .0822 .0737 1.1160 .2651 -.0626 .2270

Standardized coefficients

coeff

ProjectW .0582

********* TOTAL, DIRECT, AND INDIRECT EFFECTS OF X ON Y **********

Total effect of X on Y

Effect se t p LLCI ULCI c_ps c_cs

.0822 .0737 1.1160 .2651 -.0626 .2270 .1977 .0582

Direct effect of X on Y

Effect se t p LLCI ULCI c'_ps c'_cs

.0819 .0749 1.0932 .2750 -.0654 .2292 .1970 .0580

Indirect effect(s) of X on Y:

Effect BootSE BootLLCI BootULCI

StudentP .0003 .0119 -.0247 .0234

Partially standardized indirect effect(s) of X on Y:

Effect BootSE BootLLCI BootULCI

StudentP .0008 .0287 -.0567 .0578

Completely standardized indirect effect(s) of X on Y:

Effect BootSE BootLLCI BootULCI

StudentP .0002 .0085 -.0168 .0171

**************** ANALYSIS NOTES AND ERRORS ******************

Level of confidence for all confidence intervals in output:

95.0000

Number of bootstrap samples for percentile bootstrap confidence intervals:

5000

WARNING: Variables names longer than eight characters can produce incorrect output when some variables in the data file have the same first eight characters. Shorter variable names are recommended. By using this output, you are accepting all risk and consequences of interpreting or reporting results that may be incorrect.

------ END MATRIX -----
